# Supplementary material
Source: PubMed Central journal article supplement (PMC4794043)
Supplement: nave024651.ww_default.pdf [file nave024651.ww_default.pdf]

## Web appendix: Supplementary material

### List of contents:

1. Figure legends.
2. Figures:
  - a. Web figure 1. PRISMA flowchart;
  - b. Web figure 2. Risk of bias of individual RCTs;
  - c. Web figure 3. Funnel plot for assessment of publication bias: cardiovascular mortality;
  - d. Web figure 4. Funnel plot for assessment of publication bias: myocardial infarction;
  - e. Web figure 5. Funnel plot for assessment of publication bias: definite/probable ST;
  - f. Web figure 6. Funnel plot for assessment of publication bias: major bleeding;
  - g. Web figure 7. Funnel plot for assessment of publication bias: all-cause mortality;
  - h. Web figure 8. Funnel plot for assessment of publication bias: repeat revascularisation;
  - i. Web figure 9. Analysis of cerebrovascular accidents
  - j. Web figure 10. Analysis of TIMI major bleeding
  - k. Web figure 11. Analysis of MACCE
  - l. Web figure 12. Analysis of post-randomisation: cardiovascular mortality
  - m. Web figure 13. Analysis of post-randomisation: myocardial infarction
  - n. Web figure 14. Analysis of post-randomisation: definite/probable stent thrombosis
  - o. Web figure 15. Analysis of post-randomisation: definite stent thrombosis
  - p. Web figure 16. Analysis of post-randomisation: late and very late stent thrombosis
  - q. Web figure 17. Analysis of post-randomisation: major bleeding
  - r. Web figure 18. Analysis of post-randomisation: all-cause death
3. Tables:
  - a. Web table 1. Full electronic search in MEDLINE database
  - b. Web table 2. Patients baseline characteristics
  - c. Web table 3. Procedural characteristics
  - d. Web table 4. MACCE definitions
  - e. Web table 5. Random-effects model
  - f. Web table 6. Subgroup analyses
  - g. Web table 7. Harbord's regression test for publication bias

PRISMA, Preferred Reporting Items for Systematic Reviews and Meta-analyses; RCT, randomised controlled trial; TIMI, Thrombolysis in Myocardial Infarction; MACCE; major adverse cardiac and cerebrovascular events.

1. Figure legends.

**Web figure 1.** PRISMA (Preferred Reporting Items for Systematic Reviews and Meta-analyses) flow chart describing the study selection process along with the reasons for exclusion. DAPT, dual antiplatelet therapy; PCI, percutaneous coronary intervention.

**Web figure 2.** Risk of bias analysis for individual RCTs using the components recommended by the Cochrane Collaboration, i.e.: random sequence generation and random allocation; allocation concealment; blinding of participants, personnel, and outcome assessors; incomplete outcome data; selective outcome reporting, and other sources of bias. ARCTIC-Interruption, Assessment by a double Randomisation of a Conventional antiplatelet strategy versus a monitoring-guided strategy for drug-eluting stent implantation and, of Treatment Interruption versus Continuation 1 year after stenting)-Interruption; DES-LATE, Optimal Duration of Clopidogrel Therapy With DES to Reduce Late Coronary Arterial Thrombotic Event; EXCELLENT, Efficacy of Xience/Promus Versus Cypher to Reduce Late Loss After Stenting; ISAR-SAFE, Six versus Twelve Months of Clopidogrel Therapy After Drug-Eluting Stenting; ITALIC, Is There A Life for Drug-eluting Stents (DES) After Discontinuation of Clopidogrel; OPTIMIZE, Optimized Duration of Clopidogrel Therapy Following Treatment With the Zotarolimus-Eluting Stent in Real World Clinical Practice; PRODIGY, Prolonging Dual Antiplatelet Treatment After Grading Stent-Induced Intimal Hyperplasia Study; RESET, REal Safety and Efficacy of 3-month dual antiplatelet Therapy following Endeavor zotarolimus-eluting stent implantation; SECURITY, Second Generation Drug-Eluting Stent Implantation Followed by Six- Versus Twelve-Month Dual Antiplatelet Therapy

**Web figure 3.** Funnel plot for cardiovascular mortality. DAPT, dual antiplatelet therapy; SE, standard error; OR, odds ratio.

**Web figure 4.** Funnel plot for myocardial infarction. DAPT, dual antiplatelet therapy; SE, standard error; OR, odds ratio.

**Web figure 5.** Funnel plot for definite/probable ST. DAPT, dual antiplatelet therapy; SE, standard error; OR, odds ratio.

**Web figure 6.** Funnel plot for major bleeding. DAPT, dual antiplatelet therapy; SE, standard error; OR, odds ratio.

**Web figure 7.** Funnel plot for all-cause mortality. DAPT, dual antiplatelet therapy; SE, standard error; OR, odds ratio.

**Web figure 8.** Funnel plot for repeat revascularisation. DAPT, dual antiplatelet therapy; SE, standard error; OR, odds ratio.

**Web figure 9.** Individual and summary odds for the endpoint of cerebrovascular accidents stratified as short-term vs 12-month and extended vs 12-month DAPT regimen. DAPT, dual antiplatelet therapy; EXCELLENT, Efficacy of Xience/Promus Versus Cypher to Reduce Late Loss After Stenting; ISAR-SAFE, Six versus Twelve Months of Clopidogrel Therapy After Drug-Eluting Stenting; ITALIC, Is There A Life for Drug-eluting Stents (DES) After Discontinuation of Clopidogrel; OPTIMIZE, Optimized

Duration of Clopidogrel Therapy Following Treatment With the Zotarolimus-Eluting Stent in Real World Clinical Practice; PRODIGY, Prolonging Dual Antiplatelet Treatment After Grading Stent-Induced Intimal Hyperplasia Study; RESET, REal Safety and Efficacy of 3-month dual antiplatelet Therapy following Endeavor zotarolimus-eluting stent implantation; SECURITY, Second Generation Drug-Eluting Stent Implantation Followed by Six- Versus Twelve-Month Dual Antiplatelet Therapy; ARCTIC-Interruption, Assessment by a double Randomisation of a Conventional antiplatelet strategy versus a monitoring-guided strategy for drug-eluting stent implantation and, of Treatment Interruption versus Continuation 1 year after stenting)-Interruption; DES-LATE, Optimal Duration of Clopidogrel Therapy With DES to Reduce Late Coronary Arterial Thrombotic Event.

**Web figure 10.** Individual and summary odds for TIMI major bleeding events stratified by short-term vs 12-month and extended vs 12-month DAPT regimen. DAPT, dual antiplatelet therapy; TIMI, thrombolysis in myocardial infarction. Other abbreviations as in eFigure 9.

**Web figure 11.** Individual and summary odds for MACCE (major adverse cardiac and cerebrovascular events) stratified by short-term vs 12-month and extended vs 12-month DAPT regimen. DAPT, dual antiplatelet therapy. Other abbreviations as in eFigure 9.

**Web figure 12.** Post-randomisation analysis of individual and summary odds for the endpoint of cardiovascular mortality stratified by short-term vs 12-month and extended vs 12-month DAPT regimen. DAPT, dual antiplatelet therapy. Other abbreviations as in eFigure 9.

**Web figure 13.** Post-randomisation analysis of individual and summary odds for myocardial infarction stratified by short-term vs 12-month and extended vs 12-month DAPT regimen. DAPT, dual antiplatelet therapy. Other abbreviations as in eFigure 9.

**Web figure 14.** Post-randomisation analysis of individual and summary odds for definite/probable stent thrombosis stratified by short-term vs 12-month and extended vs 12-month DAPT regimen. DAPT, dual antiplatelet therapy. Other abbreviations as in eFigure 9.

**Web figure 15.** Post-randomisation analysis of individual and summary odds for definite stent thrombosis stratified by short-term (<12 months) vs 12 months and long-term (>12 months) vs 12 months DAPT regimen. DAPT, dual antiplatelet therapy. Other abbreviations as in eFigure 9.

**Web figure 16.** Post-randomisation analysis of individual and summary odds for late and very late stent thrombosis. DAPT, dual antiplatelet therapy. Other abbreviations as in eFigure 9.

**Web figure 17.** Post-randomisation analysis of individual and summary odds for major bleeding stratified by short-term vs 12-month and extended vs 12-month DAPT regimen. DAPT, dual antiplatelet therapy. Other abbreviations as in eFigure 9.

**Web figure 18.** Post-randomisation analysis of individual and summary odds for all-cause mortality stratified by short-term vs 12-month and extended vs 12-month DAPT regimen. DAPT, dual antiplatelet therapy. Other abbreviations as in eFigure 9.

2. Figures

Web figure 1 [PRISMA flow chart]

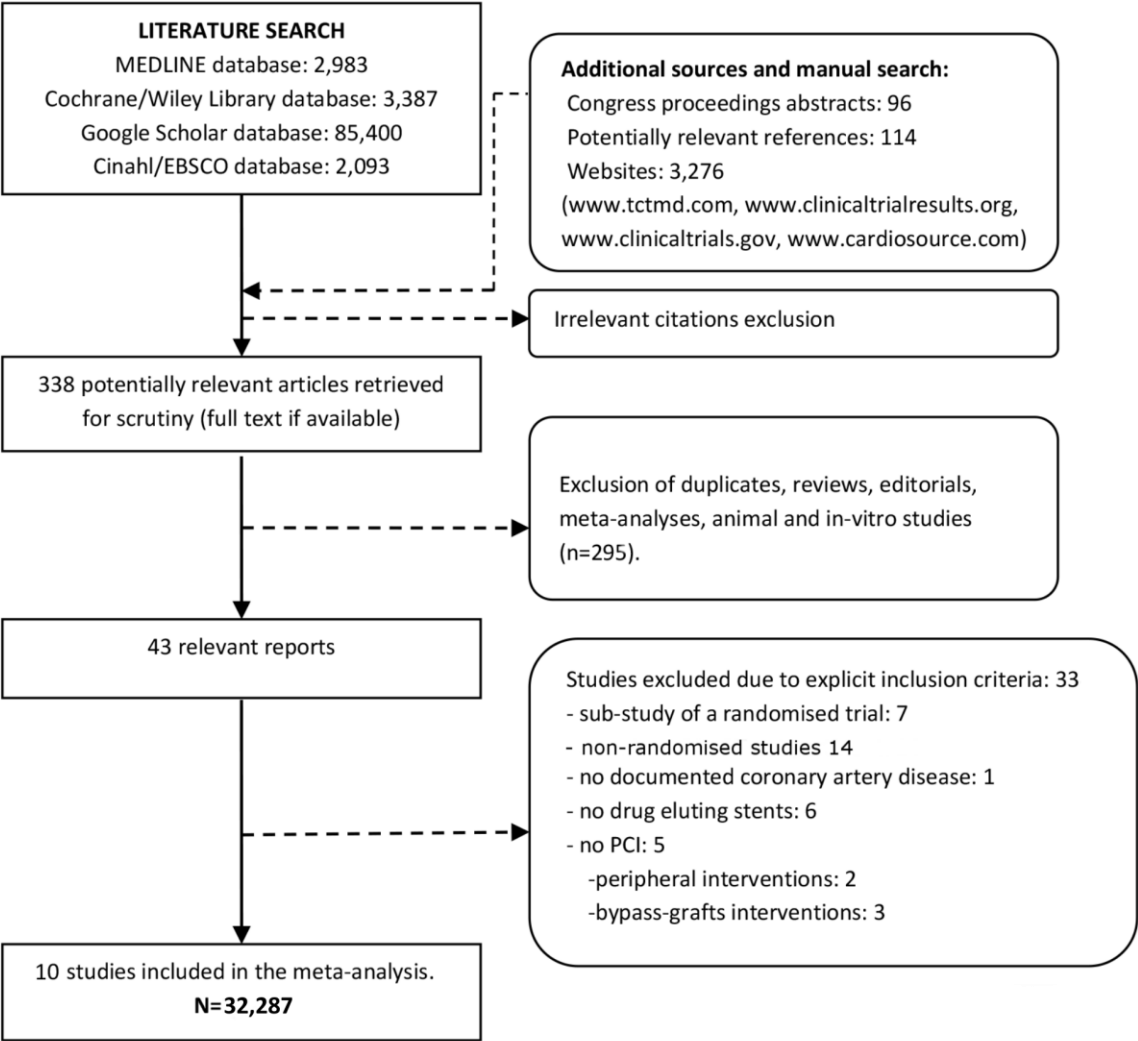

Web figure 2 [Risk of bias of individual RCTs]

| Study                                                       | Random sequence generation (selection bias) | Allocation concealment (selection bias) | Blinding of participants and personnel (performance bias) | Blinding of outcome assessment (detection bias) | Incomplete outcome data (attrition bias) | Selective reporting (reporting bias) | Other bias |
|-------------------------------------------------------------|---------------------------------------------|-----------------------------------------|-----------------------------------------------------------|-------------------------------------------------|------------------------------------------|--------------------------------------|------------|
| ARCTIC-Interruption                                         |                                             |                                         |                                                           |                                                 |                                          |                                      |            |
| DAPT                                                        |                                             |                                         |                                                           |                                                 |                                          |                                      |            |
| DES-LATE                                                    |                                             |                                         |                                                           |                                                 |                                          |                                      |            |
| EXCELLENT                                                   |                                             |                                         |                                                           |                                                 |                                          |                                      |            |
| ISAR-SAFE                                                   |                                             |                                         |                                                           |                                                 |                                          |                                      |            |
| ITALIC                                                      |                                             |                                         |                                                           |                                                 |                                          |                                      |            |
| OPTIMIZE                                                    |                                             |                                         |                                                           |                                                 |                                          |                                      |            |
| PRODIGY                                                     |                                             |                                         |                                                           |                                                 |                                          |                                      |            |
| RESET                                                       |                                             |                                         |                                                           |                                                 |                                          |                                      |            |
| SECURITY                                                    |                                             |                                         |                                                           |                                                 |                                          |                                      |            |
| low risk of bias;  unclear risk of bias;  high risk of bias |                                             |                                         |                                                           |                                                 |                                          |                                      |            |

Web figure 3 [Funnel plot: Cardiovascular mortality]

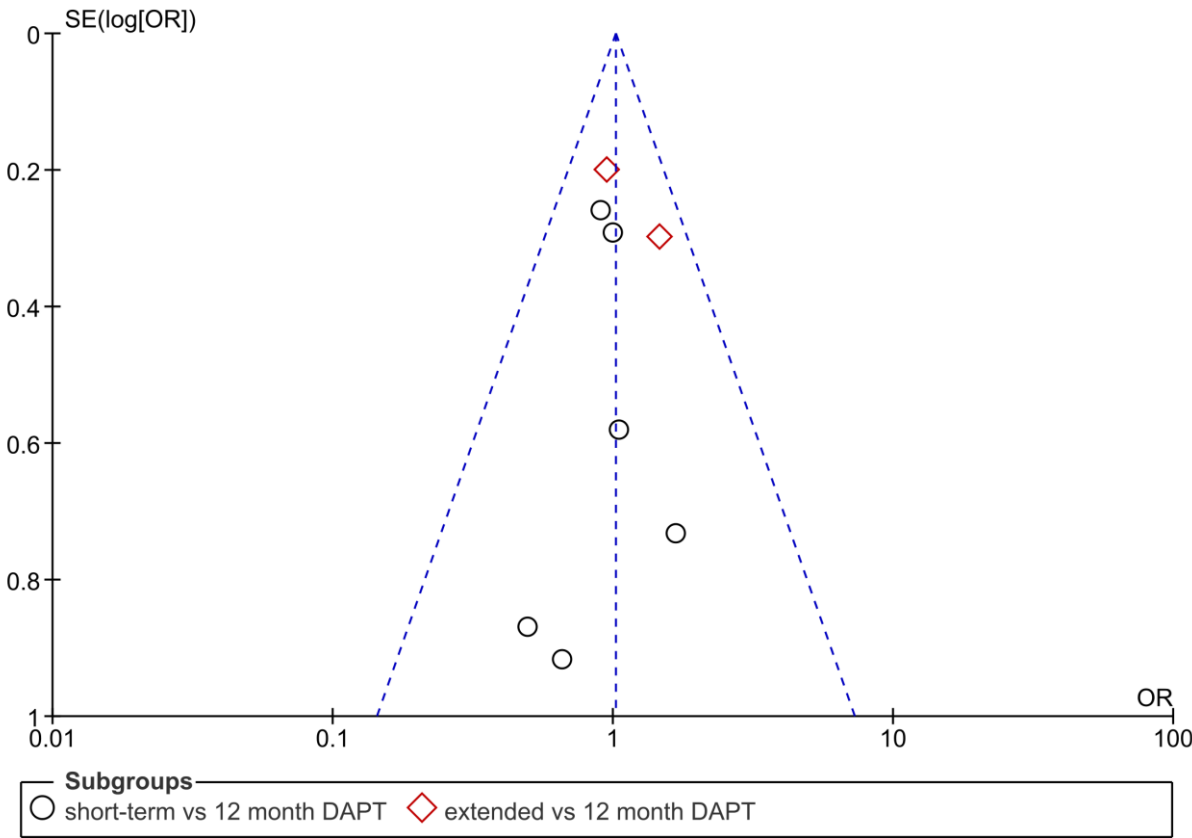

Web figure 4 [Funnel plot: Myocardial infarction]

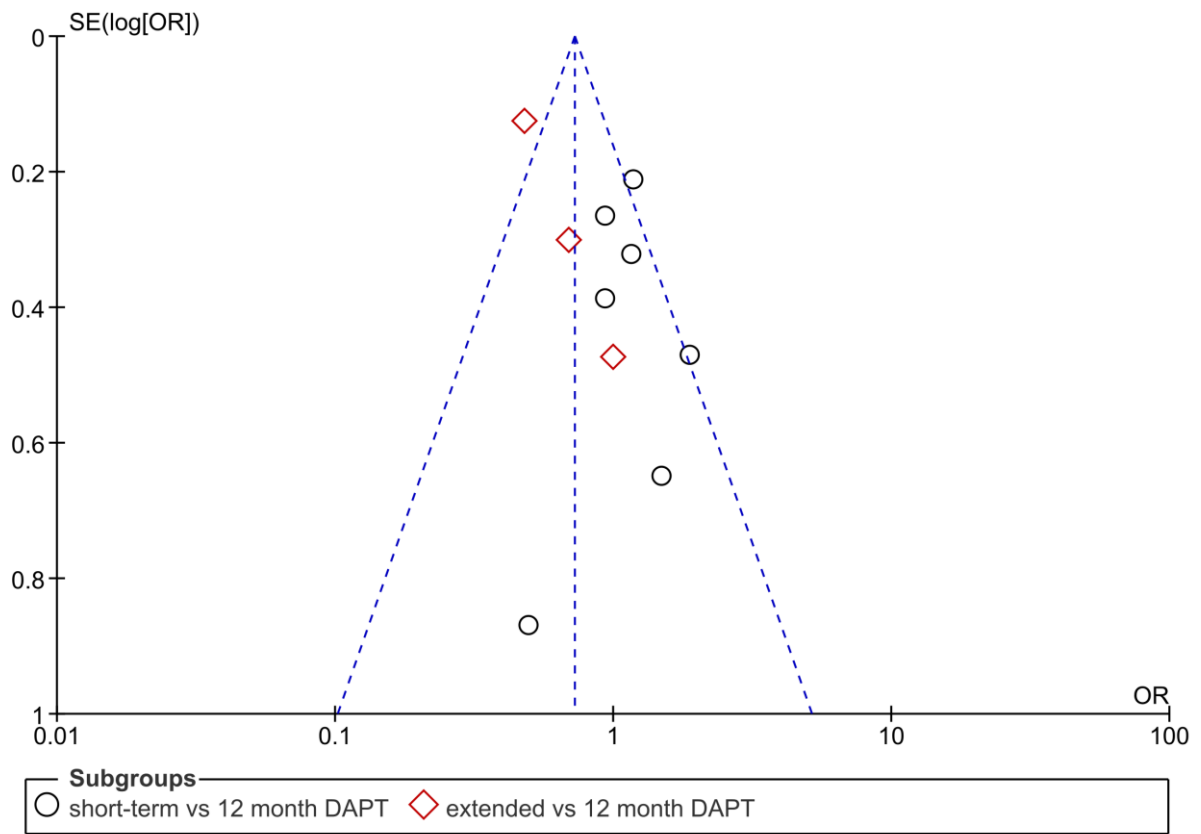

Web figure 5 [Funnel plot: definite/probable ST]

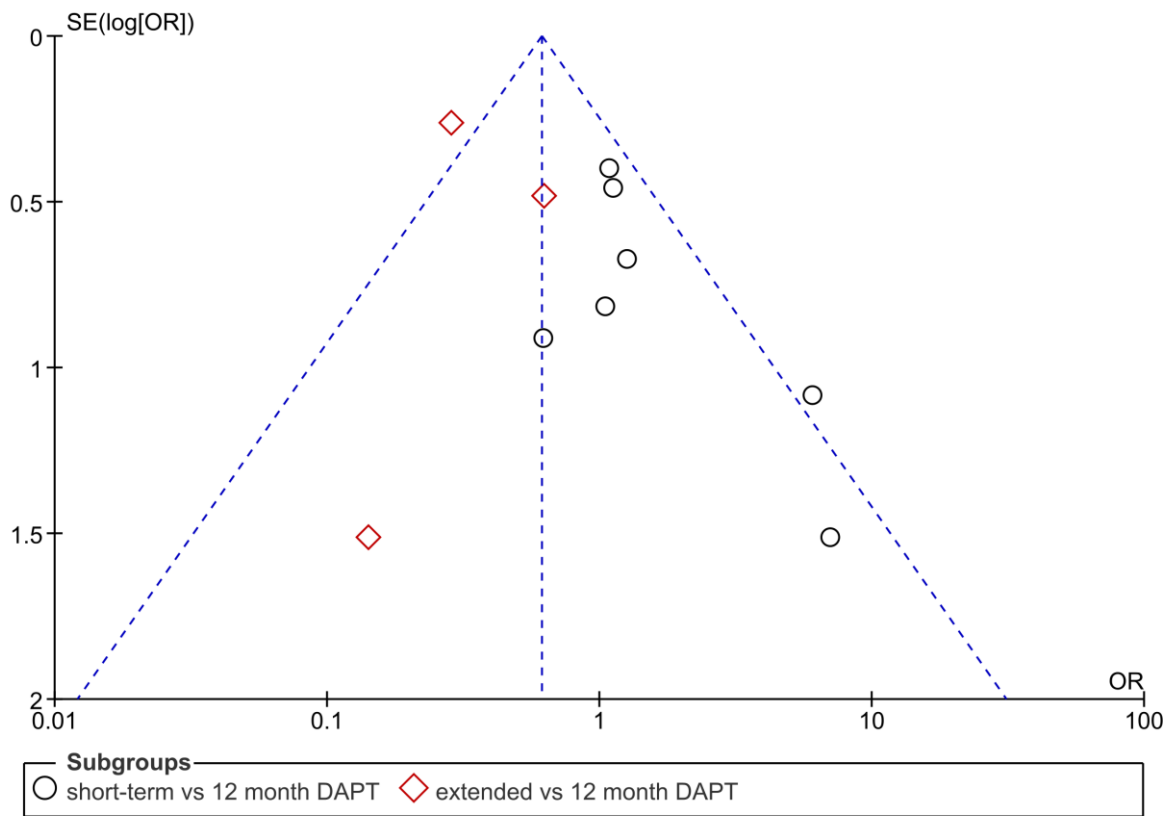



Web figure 6 [Funnel plot: major bleeding]

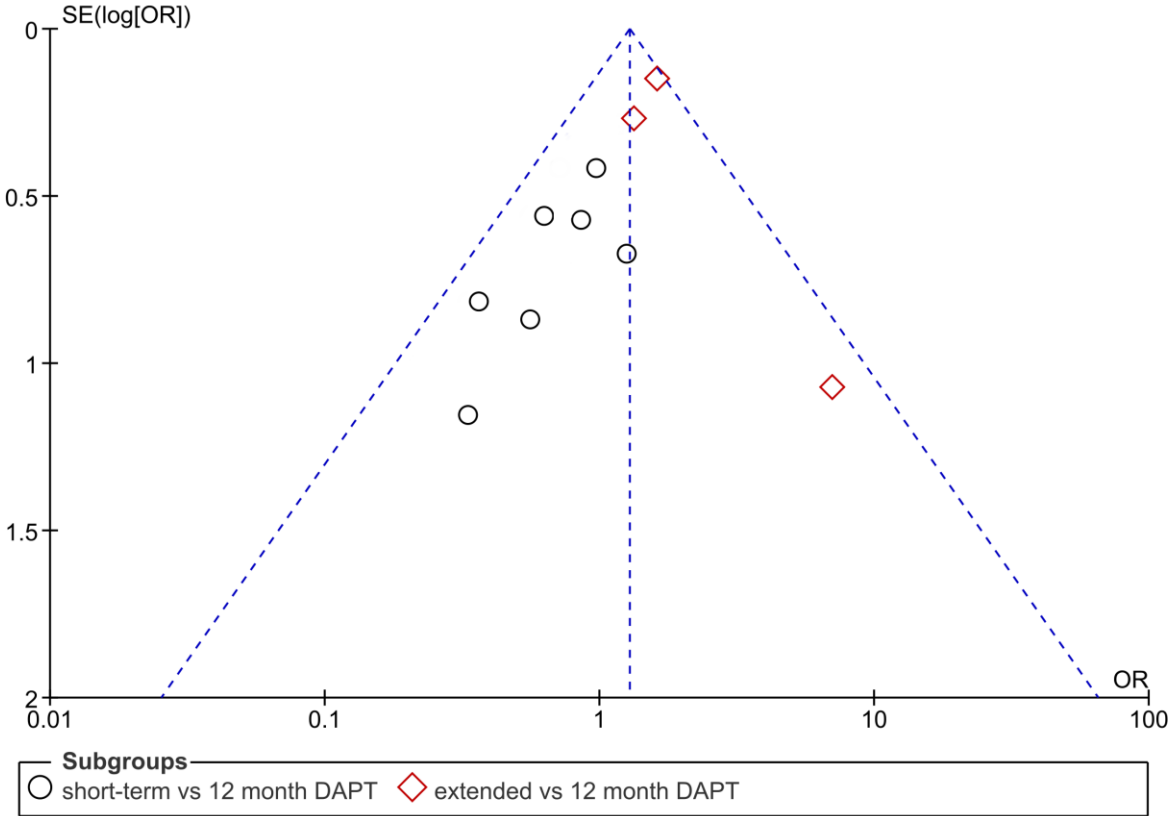

Web figure 7 [Funnel plot: all-cause mortality]

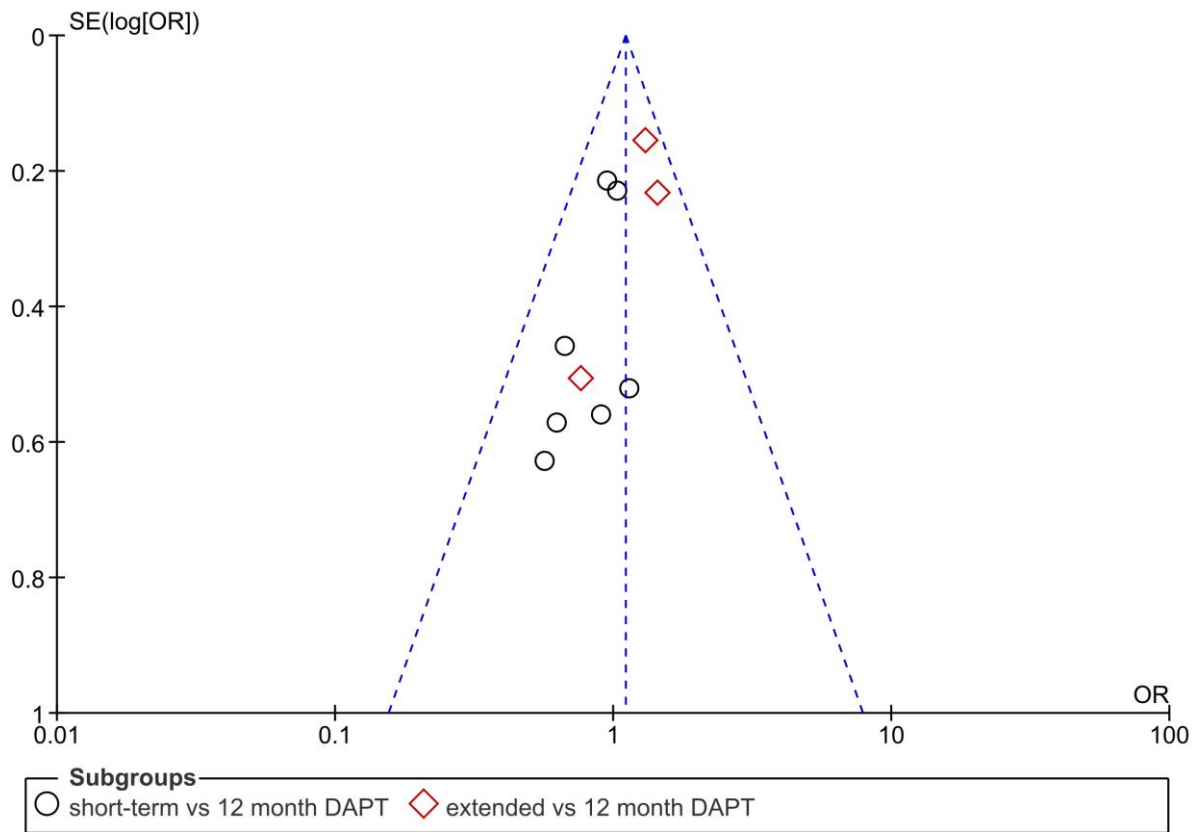

Web figure 8 [Funnel plot: repeat revascularisation]

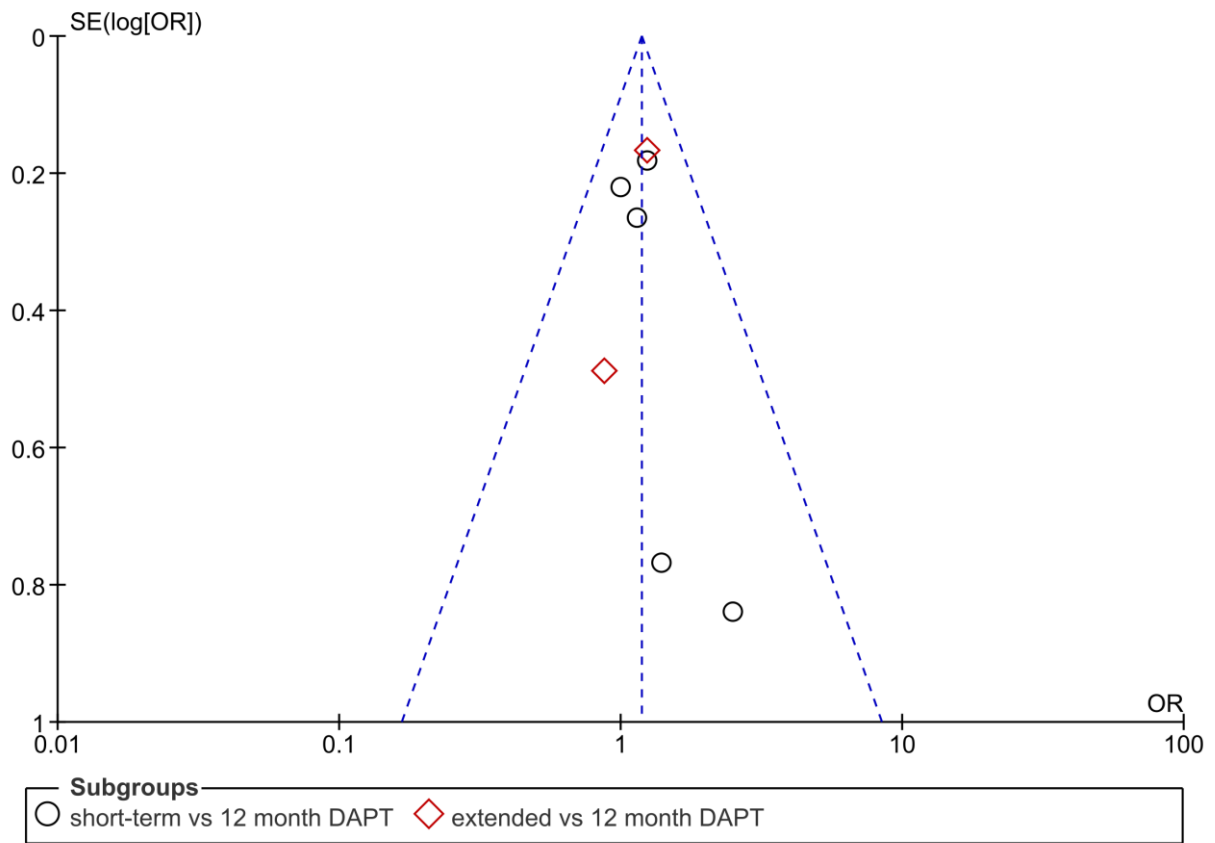

### Web figure 9 [CEREBROVASCULAR ACCIDENTS]

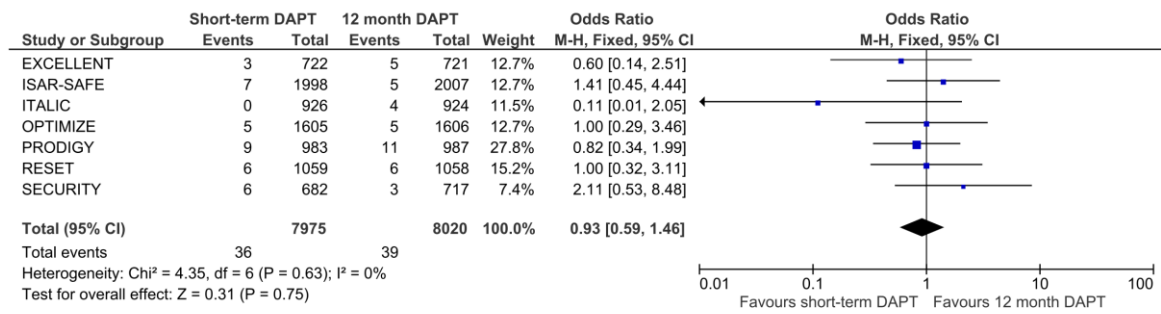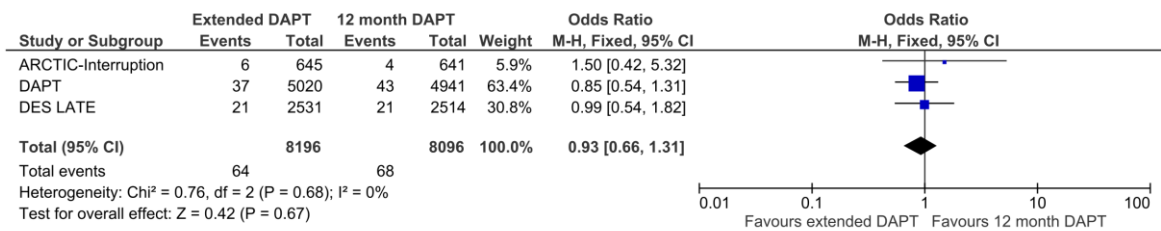

**Web figure 10 [TIMI major bleeding]**

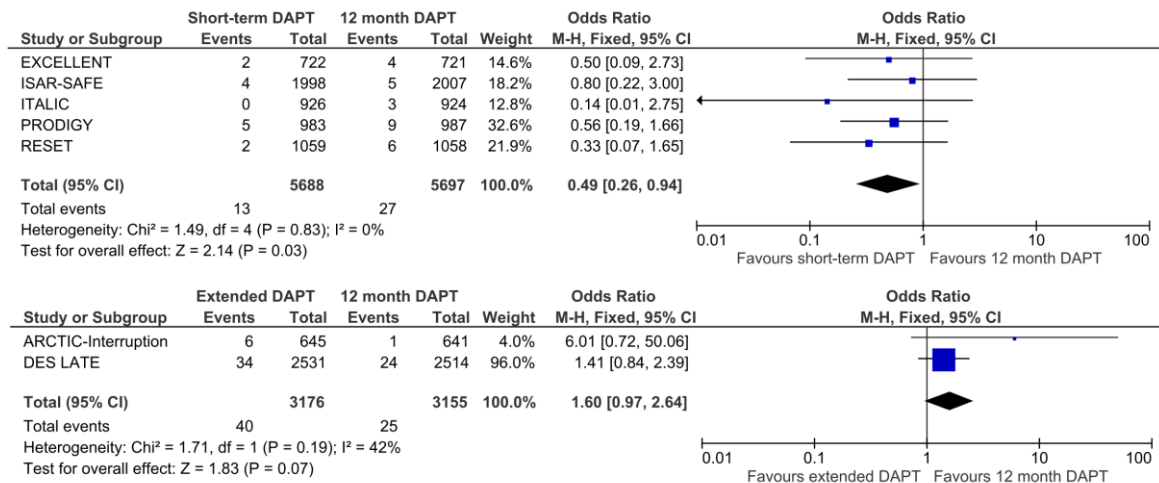

**Web figure 11 [MACCE]**

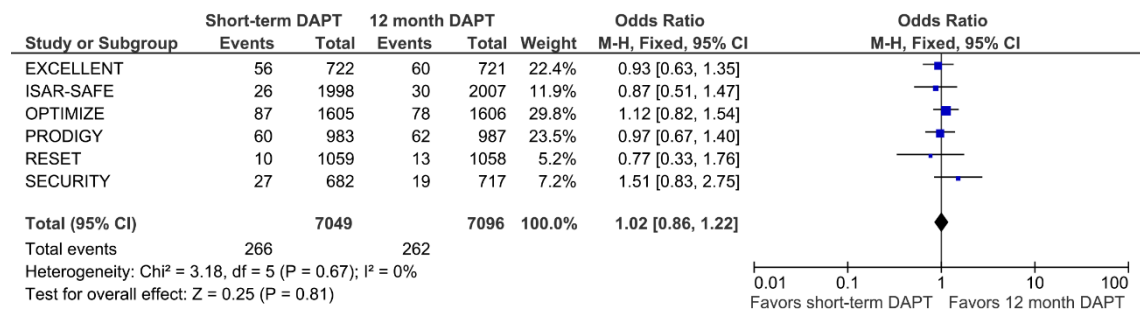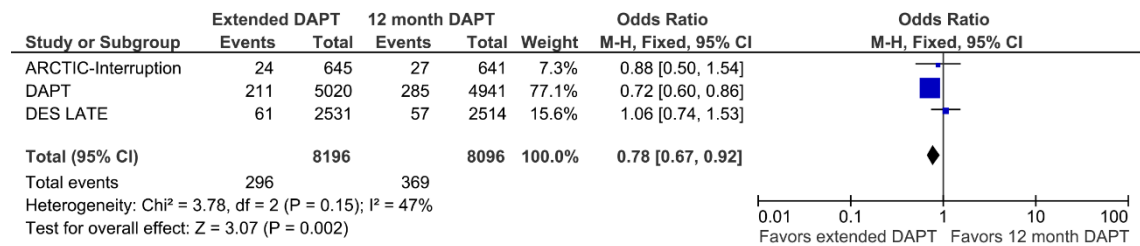

**Web figure 12 [POST-RANDOMIZATION CV MORTALITY]**

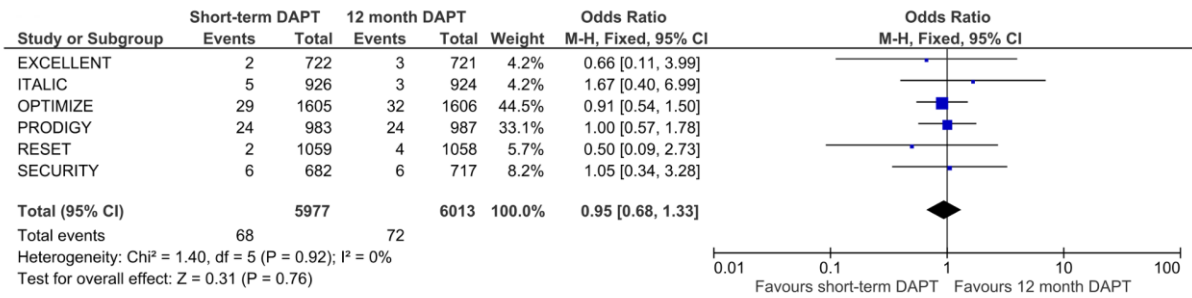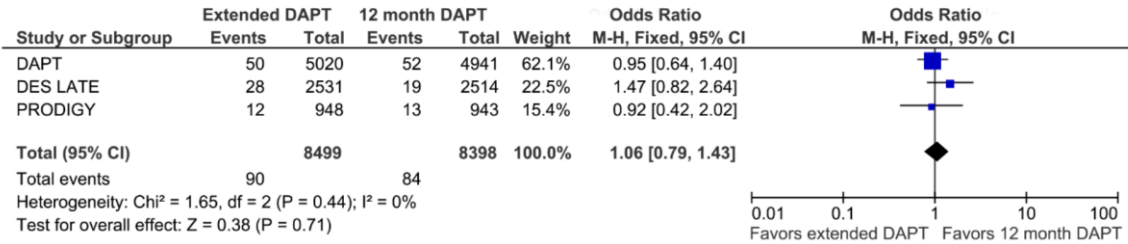

### Web figure 13 [POST-RANDOMIZATION MI]

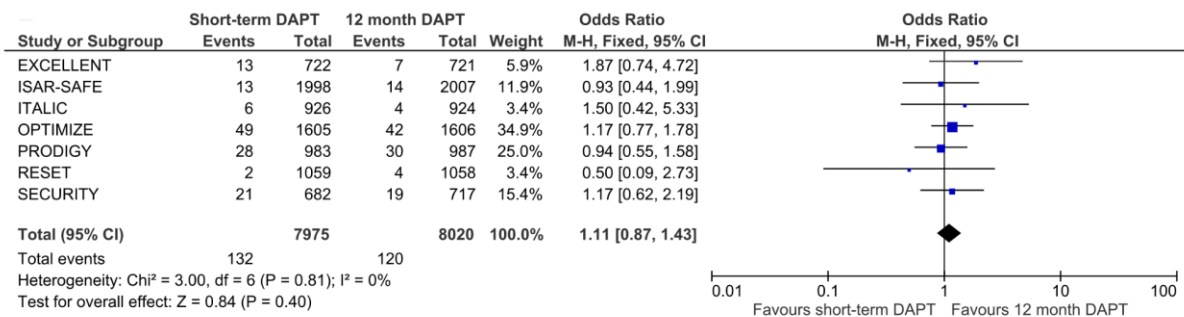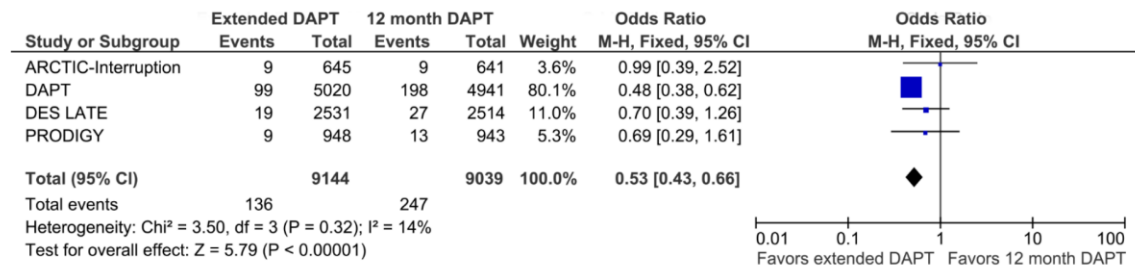



**Web figure 14 [POST-RANDOMIZATION DEFINITE/PROBABLE ST]**

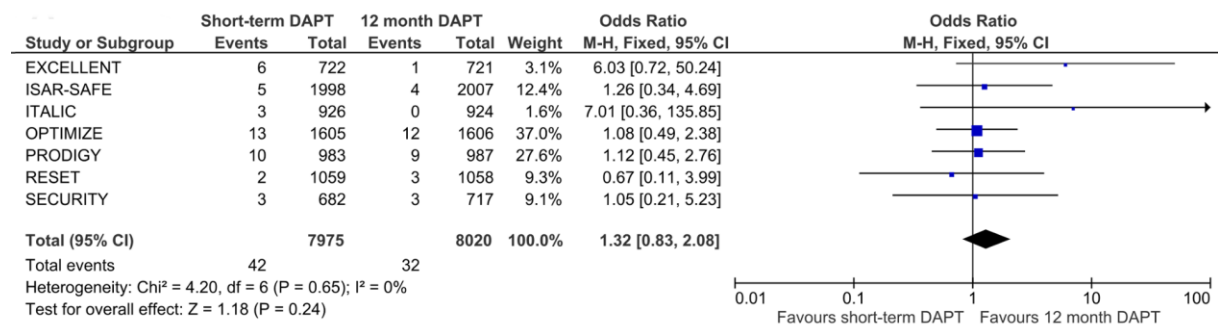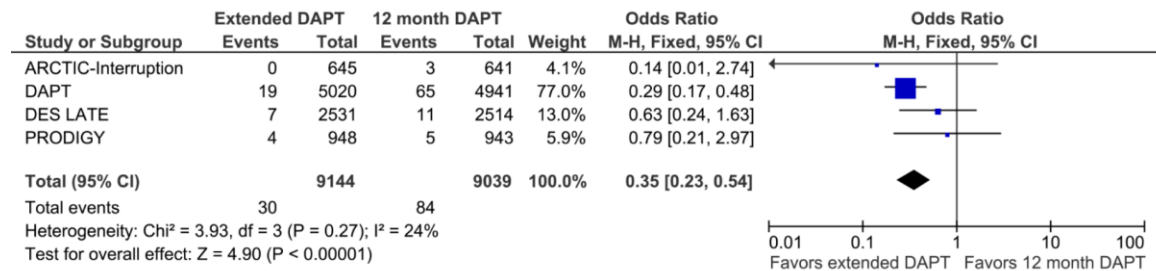

### Web figure 15 [POST-RANDOMIZATION DEFINITE ST]

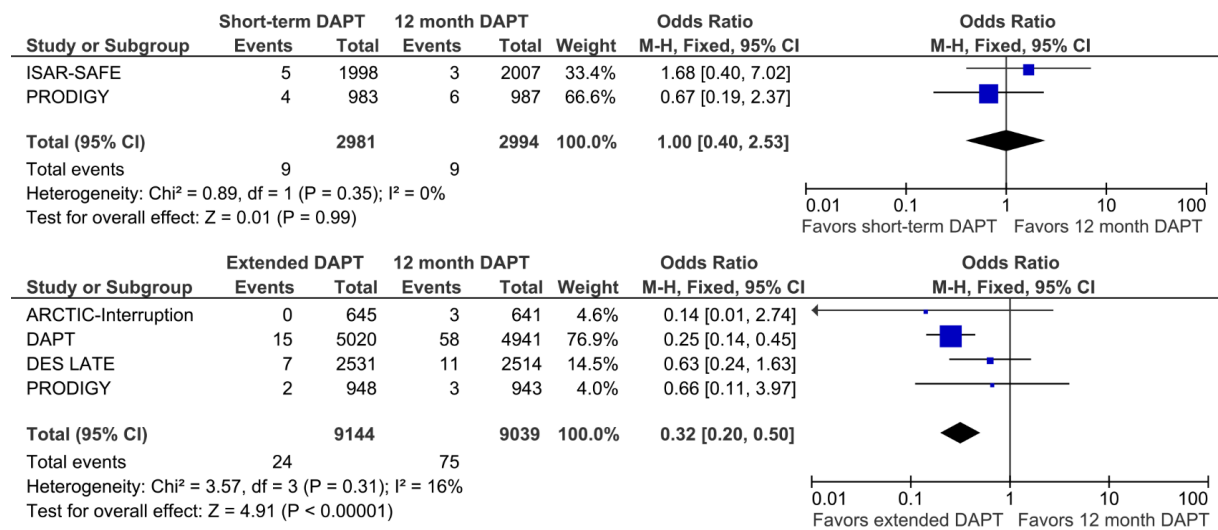

**Web figure 16 [POST-RANDOMIZATION LATE AND VERY LATE ST]**

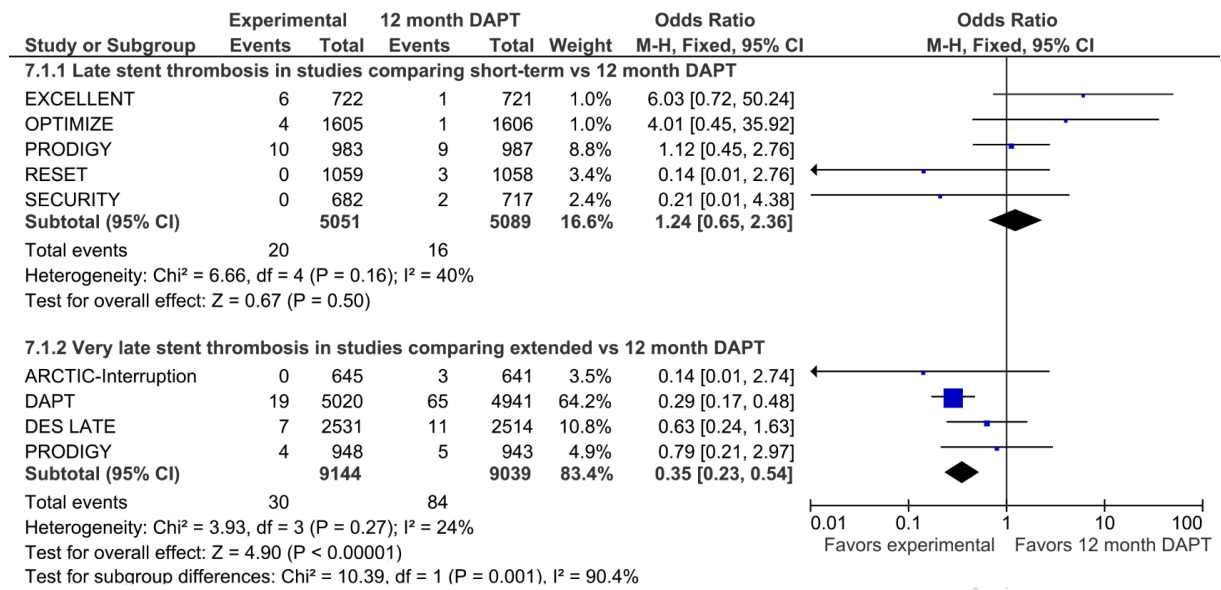

### Web figure 17 [POST-RANDOMIZATION MAJOR BLEEDING]

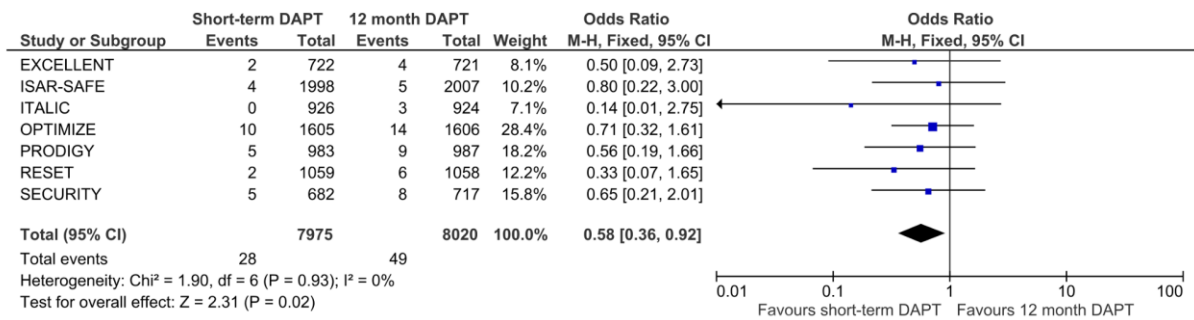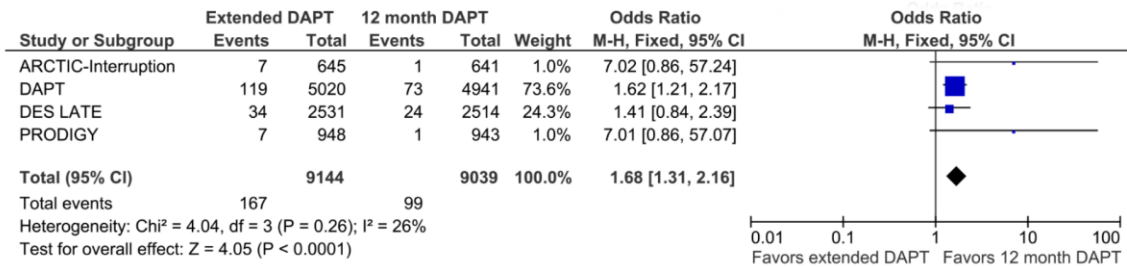

**Web figure 18 [POST-RANDOMIZATION ALL-CAUSE DEATH]**

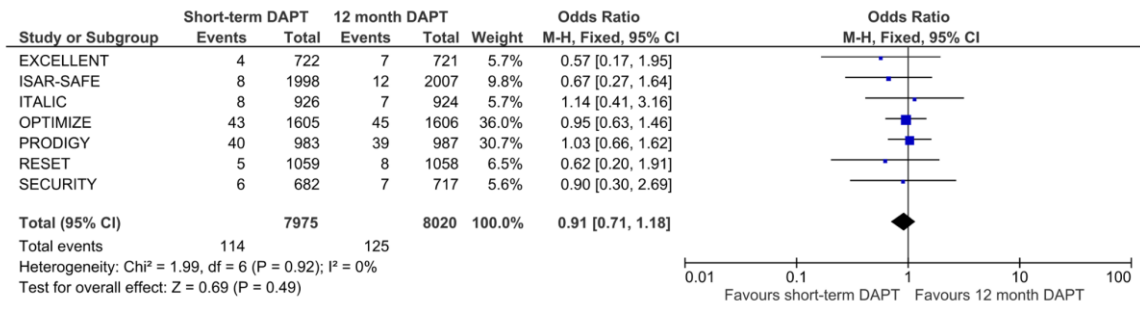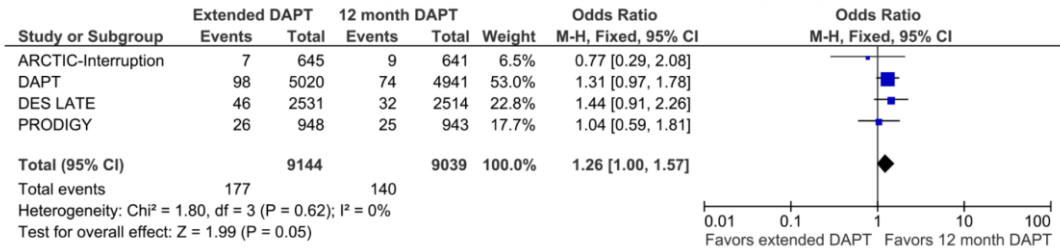

### 3. Tables

**Web table 1. Full electronic search in MEDLINE database through 25<sup>th</sup> Nov 2014**

| Search | Query                                           | Items found |
|--------|-------------------------------------------------|-------------|
| 1      | Search Antiplatelet therapy                     | 13,371      |
| 2      | Search Dual antiplatelet therapy                | 2,089       |
| 3      | Search DAPT                                     | 636         |
| 4      | Search Clopidogrel                              | 9,656       |
| 5      | Search Plavix                                   | 9,687       |
| 6      | Search Prasugrel                                | 1,211       |
| 7      | Search Eficent                                  | 1,211       |
| 8      | Search Ticagrelor                               | 818         |
| 9      | Search Brilinta                                 | 818         |
| 10     | Search Thienopyridine                           | 870         |
| 11     | Search P2Y12                                    | 1,723       |
| 12     | Search Short-term AND DAPT                      | 9           |
| 13     | Search Shortened AND DAPT                       | 1           |
| 14     | Search Premature* AND DAPT                      | 8           |
| 15     | Search Early* AND DAPT                          | 66          |
| 16     | Search Antiplatelet therapy AND random*         | 2,985       |
| 17     | Search Dual antiplatelet therapy AND random*    | 538         |
| 18     | Search DAPT AND random*                         | 106         |
| 19     | Search Clopidogrel AND random*                  | 2,278       |
| 20     | Search Plavix AND random*                       | 2,282       |
| 21     | Search Prasugrel AND random*                    | 326         |
| 22     | Search Eficent AND random*                      | 326         |
| 23     | Search Ticagrelor AND random*                   | 233         |
| 24     | Search Brilinta AND random*                     | 233         |
| 25     | Search Thienopyridine AND random*               | 226         |
| 26     | Search P2Y12 AND random*                        | 302         |
| 27     | Search Short-term AND DAPT AND random*          | 5           |
| 28     | Search Shortened AND DAPT AND random*           | 0           |
| 29     | Search Premature* AND DAPT AND random*          | 1           |
| 30     | Search Early* AND DAPT AND random*              | 10          |
| 31     | Search Antiplatelet therapy AND controlled      | 2,360       |
| 32     | Search Dual antiplatelet therapy AND controlled | 387         |
| 33     | Search DAPT AND controlled                      | 70          |
| 34     | Search Clopidogrel AND controlled               | 1,931       |
| 35     | Search Plavix AND controlled                    | 1,932       |
| 36     | Search Prasugrel AND controlled                 | 264         |
| 37     | Search Eficent AND controlled                   | 264         |
| 38     | Search Ticagrelor AND controlled                | 182         |
| 39     | Search Brilinta AND controlled                  | 182         |
| 40     | Search Thienopyridine AND controlled            | 181         |
| 41     | Search P2Y12 AND controlled                     | 248         |
| 42     | Search Short-term AND DAPT AND controlled       | 5           |
| 43     | Search Shortened AND DAPT AND controlled        | 0           |
| 44     | Search Premature* AND DAPT AND controlled       | 1           |
| 45     | Search Early* AND DAPT AND controlled           | 3           |

**Web table 2. Patients' baseline characteristics.**

| Study                | DAPT duration | N of pts | Age (mean±SD)      | Male (%) | BMI (%)            | Diabetes (%) | Dyslipidemia (%) | Hyper-tension (%) | Current smoker (%) | LVEF     | Previous PCI (%) | presentation                      |         |           | MVD (%) |
|----------------------|---------------|----------|--------------------|----------|--------------------|--------------|------------------|-------------------|--------------------|----------|------------------|-----------------------------------|---------|-----------|---------|
|                      |               |          |                    |          |                    |              |                  |                   |                    |          |                  | Stable CAD or silent ischemia (%) | ACS (%) | STEMI (%) |         |
| ARCTIC- Interruption | 12 months     | 624      | 64 (57-73)*        | 81       | 27 (25-30)*        | 36           | 68               | 62                | 24                 | NR       | 40               | 73                                | 27      | 0         | NR      |
|                      | 18 months     | 635      | 64 (57-73)*        | 80       | 27 (25-29)*        | 31           | 67               | 59                | 23                 | NR       | 43               | 75                                | 25      | 0         | NR      |
| DAPT                 | 12 months     | 4941     | 61.6               | 74       | 30.6               | 30.1         | NR               | 74.0              | 24.7               | NR       | 31               | 37.8                              | 42.5    | 10.3      | NR      |
|                      | 30 months     | 5020     | 61.8               | 75.3     | 30.5               | 31.1         | NR               | 75.8              | 24.6               | NR       | 30.4             | 37.5                              | 42.8    | 10.6      | NR      |
| DES-LATE             | 12 months     | 2514     | 62.3±10.1          | 69.6     | NR                 | 28.0         | NR               | 56.6              | 28.7               | 59.4±8.7 | 11.0             | 38.0                              | 61.7    | 12.5      | 47.1    |
|                      | 24 months     | 2531     | 62.5±10.0          | 69.1     | NR                 | 28.2         | NR               | 58.4              | 27.4               | 59.3±9.4 | 12.4             | 39.9                              | 59.7    | 12.4      | 50.5    |
| EXCELLENT            | 6 months      | 722      | 63.0±9.6           | 65.1     | 24.9±3.1           | 37.7         | 75.2             | 72.7              | 27.4               | 61.0±9.6 | 9.3              | 48.9                              | 51.1    | 2.6       | 20.6    |
|                      | 12 months     | 721      | 62.4±10.4          | 63.9     | 25.1±3.0           | 38.6         | 76.3             | 73.8              | 25.8               | 61.6±9.4 | 8.6              | 48.0                              | 52.0    | 3.6       | 19.8    |
| ISAR-SAFE            | 6 months      | 1998     | 67.2 (59.3-73.3) * | 80.7     | 27.2 (24.9-30.1) * | 24.8         | 87.5             | 90.1              | 14.6               | NR       | NR               | 59.5                              | 39.8    | 7.9       | 61.3    |
|                      | 12 months     | 2007     | 67.2 (59.1-73.7) * | 80.5     | 27.5 (24.9-30.4) * | 24.2         | 87.4             | 91.5              | 15.3               | NR       | NR               | 59.1                              | 40.3    | 8.3       | 61.8    |
| ITALIC               | 6 months      | 926‡     | 61.7±10.9          | 80.8     | 27.0±4.6           | 36.3         | 67.1             | 65.2              | 50.9               | NR       | 24.1             | 61.4                              | 23.0    | 0.1       | NR      |
|                      | 12 months     | 924‡     | 61.5±11.1          | 79.2     | 27.1±4.7           | 37.8         | 67.1             | 64.7              | 52.7               | NR       | 22.5             | 61.5                              | 23.5    | 0.3       | NR      |
| OPTIMIZE             | 3 months      | 1563     | 61.3±10.4          | 63.5     | NR                 | 35.4         | 63.2             | 86.4              | 18.6               | NR       | 20.9             | 68.4                              | 31.6    | 0         | NR      |
|                      | 12 months     | 1556     | 61.9±10.6          | 63.1     | NR                 | 35.3         | 63.7             | 88.2              | 17.3               | NR       | 19.1             | 67.8                              | 32.2    | 0         | NR      |
| PRODIGY              | 6 months      | 983      | 67.9±11            | 76.0     | 26.7               | 23.7         | 53.4             | 70.4              | 25.1               | 50.0     | 17.7             | 25.4                              | 74.6    | 33.3      | 66.0    |
|                      | 24 months     | 987      | 67.8±11            | 77.4     | 26.6               | 24.7         | 56.0             | 73.0              | 22.5               | 55.0     | 18.6             | 26.0                              | 74.2    | 32.5      | 65.2    |
| RESET                | 3 months      | 1059     | 62.4±9.4           | 64.4     | 25.0±3.2           | 29.8         | 57.7             | 62.3              | 25.2               | 64.2±9.4 | 3.5              | 44.5                              | 55.5    | 14.7†     | 43.1    |
|                      | 12 months     | 1058     | 62.4±9.8           | 62.9     | 24.9±3.1           | 28.8         | 59.9             | 61.4              | 22.8               | 63.9±9.4 | 3.0              | 46.3                              | 53.7    | 13.8†     | 42.9    |
| SECURITY             | 6 months      | 682      | 64.9±10.2          | 77.6     | NR                 | 30.4         | 65.4             | 74.5              | 20.5               | 56.3±8.7 | 19.4             | 61.6                              | 38.4    | 0         | 43.8    |
|                      | 12 months     | 717      | 65.5±10.1          | 76.8     | NR                 | 31.4         | 60.8             | 71.1              | 24.4               | 56.6±8.2 | 16.2             | 61.6                              | 38.4    | 0         | 40.8    |

\* values reported as range

† AMI

‡data available for per-protocol population

DAPT, dual antiplatelet therapy; SD, standard deviation; BMI, body mass index; LVEF, left ventricle ejection fraction; PCI, percutaneous coronary intervention; CAD, coronary artery disease; ACS, acute coronary syndrome; STEMI, ST-segment elevation myocardial infarction; MVD, multivessel disease; ARCTIC-Interruption, Assessment by a double Randomisation of a Conventional antiplatelet strategy versus a monitoring-guided strategy for drug-eluting stent implantation and, of Treatment Interruption versus Continuation 1 year after stenting)-Interruption; DES-LATE, Optimal Duration of Clopidogrel Therapy With DES to Reduce Late Coronary Arterial Thrombotic Event; EXCELLENT, Efficacy of Xience/Promus Versus Cypher to Reduce Late Loss After Stenting; ISAR-SAFE, Six versus Twelve Months of Clopidogrel Therapy After Drug-Eluting Stenting; ITALIC, Is There A Life for Drug-eluting Stents (DES) After Discontinuation of Clopidogrel; OPTIMIZE, Optimized Duration of Clopidogrel Therapy Following Treatment With the Zotarolimus-Eluting Stent in Real World Clinical Practice; PRODIGY, Prolonging Dual Antiplatelet Treatment After Grading Stent-Induced Intimal Hyperplasia Study; RESET, REal Safety and Efficacy of 3-month dual antiplatelet Therapy following Endeavor zotarolimus-eluting stent implantation; SECURITY, Second Generation Drug-Eluting Stent Implantation Followed by Six- Versus Twelve-Month Dual Antiplatelet Therapy; NR, not reported

**Web table 3. Procedural characteristics.**

| Study                | DAPT duration | Lesion B2/C type | LAD   | Stents per subject | Stent length | Antiplatelet therapy                                              | Loading dose P2Y12 | GPI | Stent type used |      |      |      |        |
|----------------------|---------------|------------------|-------|--------------------|--------------|-------------------------------------------------------------------|--------------------|-----|-----------------|------|------|------|--------|
|                      |               |                  |       |                    |              |                                                                   |                    |     | SES             | PES  | EES  | ZES  | BP-DES |
| ARCTIC- Interruption | 12 months     | NR               | 52    | NR                 | NR           | Clopidogrel 90%; Prasugrel 9%; Aspirin 100%                       | NR                 | NR  | 40              |      | 64   |      | NR     |
|                      | 18 months     | NR               | 54    | NR                 | NR           | Clopidogrel 90%; Prasugrel 9% Aspirin 99%                         | NR                 | NR  | 43              |      | 62   |      | NR     |
| DAPT                 | 12 months     | 43.07            | 40.36 | 1.45               | 27.43        | Clopidogrel 65.3%; Prasugrel 34.7%                                | YES                | NR  | 11.2            | 26.8 | 47.2 | 12.7 | NR     |
|                      | 30 months     | 43.47            | 41.22 | 1.47               | 27.70        |                                                                   | YES                | NR  |                 |      |      |      |        |
| DES-LATE             | 12 months     | 78.2             | 50.6  | 1.2±0.5            | 29.9±15.4    | Clopidogrel 99.5%; Aspirin 99.6%                                  | NR                 | NR  | 44.3            | 20.3 | 10.4 | 19.0 | NR     |
|                      | 24 months     | 78.8             | 49.5  | 1.3±0.5            | 30.8±16.3    | Clopidogrel 99.6%; Aspirin 99.6%                                  | NR                 | NR  | 43.5            | 20.5 | 11.9 | 18.9 | NR     |
| EXCELLENT            | 6 months      | 52.8             | 50.6  | 1.6±1.0            | 27.8±13.0    | Clopidogrel 98.7%; Aspirin 99.4%                                  | YES                | 1.7 | 25.2            | 0    | 74.8 | 0    | 0      |
|                      | 12 months     | 53.8             | 49.0  | 1.6±0.9            | 28.3±13.7    | Clopidogrel 99.6%; Aspirin 98.7%                                  | YES                | 1.7 | 25.2            | 0    | 74.8 | 0    | 0      |
| ISAR-SAFE            | 6 months      | 42.3#            | 39.8  | 1.7±1.0            | 28 (18-43)   | Clopidogrel NR                                                    | NR                 | NR  | 25.0            | 2.2  | 47.5 | 15.6 | 0.5    |
|                      | 12 months     | 45.5#            | 40.6  | 1.7±1.0            | 28 (18-43)   | Clopidogrel NR                                                    | NR                 | NR  | 24.1            | 2.3  | 49.3 | 14.7 | 0.3    |
| ITALIC               | 6 months      | NR               | 73.4  | 1.7±1.0            | 38.6±25.6    | Clopidogrel 98.9%; Aspirin 100%                                   | YES                | 0   | 0               | 0    | 100  | 0    | 0      |
|                      | 12 months     | NR               | 72.3  | 1.7±1.0            | 37.8±26.1    | Clopidogrel 98.4%; Aspirin 100%                                   | YES                | 0   | 0               | 0    | 100  | 0    | 0      |
| OPTIMIZE             | 3 months      | 37.0*            | 47.9  | 1.6±0.8            | 32.8±19.9    | Clopidogrel 99.8%                                                 | YES                | NR  | 0               | 0    | 0    | 100  | 0      |
|                      | 12 months     | 37.4*            | 46.6  | 1.6±0.8            | 32.7±20.0    | Clopidogrel 100%                                                  | YES                | NR  | 0               | 0    | 0    | 100  | 0      |
| PRODIGY              | 6 months      | 67.6             | 52.7  | 1.9±1.3            | 30 (20-48)†  | Clopidogrel 100%; Aspirin 100%                                    | YES                | NR  | NR              | 24.9 | 24.9 | 25.1 | NR     |
|                      | 24 months     | 65.1             | 52.5  | 1.8±1.2            | 30 (20-48)†  | Clopidogrel 100%; Aspirin 100%                                    | YES                | NR  | NR              | 24.8 | 25.1 | 25.1 | NR     |
| RESET                | 3 months      | 67.9             | 52.7  | NR‡                | NR‡          | NR                                                                | YES                | 1.9 | 0               | 0    | 0    | 100  | NR     |
|                      | 12 months     | 69.2             | 53.6  | NR‡                | NR‡          | NR                                                                | YES                | 2.0 | 28.5            | 0    | 30.0 | 41.5 | NR     |
| SECURITY             | 6 months      | 21.1*            | 43.0  | 1.6±0.9            | 19.1±7.2     | Clopidogrel 98.1%; Prasugrel 0.3% Ticagrelor 0.6%; Aspirin 99%    | YES                | 3.7 | 0               | 0    | 20.1 | 42.1 | 32.5   |
|                      | 12 months     | 21.0*            | 44.0  | 1.6±0.9            | 19.0±7.2     | Clopidogrel 99.3%; Prasugrel 0.1%; Ticagrelor 0.3%; Aspirin 99.4% | YES                | 4.2 | 0               | 0    | 20.3 | 40.3 | 34.8   |

\* lesion C type only  
† interquartile range  
‡ data available as per lesion  
# defined as “complex lesion”

DAPT, dual antiplatelet therapy; LAD, left anterior descending artery; GPI, glycoprotein IIb/IIIa inhibitor; SES, sirolimus eluting stent; PES, paclitaxel eluting stent; EES, everolimus eluting stent; ZES, zotarolimus eluting stent; BP-DES, biodegradable polymer-drug eluting stent; ARCTIC-Interruption, Assessment by a double Randomisation of a Conventional antiplatelet strategy versus a monitoring-guided strategy for drug-eluting stent implantation and, of Treatment Interruption versus Continuation 1 year after stenting)-Interruption; DES-LATE, Optimal Duration of Clopidogrel Therapy With DES to Reduce Late Coronary Arterial Thrombotic Event; EXCELLENT, Efficacy of Xience/Promus Versus Cypher to Reduce Late Loss After Stenting; ISAR-SAFE, Six versus Twelve Months of Clopidogrel Therapy After Drug-Eluting Stenting; ITALIC, Is There A Life for Drug-eluting Stents (DES) After Discontinuation of Clopidogrel; OPTIMIZE, Optimized Duration of Clopidogrel Therapy Following Treatment With the Zotarolimus-Eluting Stent in Real World Clinical Practice; PRODIGY, Prolonging Dual Antiplatelet Treatment After Grading Stent-Induced Intimal Hyperplasia Study; RESET, REal Safety and Efficacy of 3-month dual antiplatelet Therapy following Endeavor zotarolimus-eluting stent implantation; SECURITY, Second Generation Drug-Eluting Stent Implantation Followed by Six- Versus Twelve-Month Dual Antiplatelet Therapy; NR, not reported.



#### Web table 4. MACCE definitions.

| Study               | MACCE definition                                                                            |
|---------------------|---------------------------------------------------------------------------------------------|
| ARCTIC-Interruption | Any death, myocardial infarction, stent thrombosis, stroke or TIA, urgent revascularization |
| DAPT                | Death, myocardial infarction, or stroke                                                     |
| DES-LATE            | Cardiac death, myocardial infarction, or stroke                                             |
| EXCELLENT           | Death, myocardial infarction, stroke or any revascularization                               |
| ISAR-SAFE           | Death, myocardial infarction, stent thrombosis, or stroke                                   |
| OPTIMIZE            | Death, myocardial infarction, or stroke                                                     |
| PRODIGY             | Death, myocardial infarction, stroke or TIA                                                 |
| RESET               | Cardiovascular death, myocardial infarction, or cerebrovascular accident                    |
| SECURITY            | Cardiac death, myocardial infarction, stroke, definite or probable stent thrombosis         |

MACCE; major adverse cardiac and cerebrovascular events; TIA, transient ischemic attack; ARCTIC-Interruption, Assessment by a double Randomisation of a Conventional antiplatelet strategy versus a monitoring-guided strategy for drug-eluting stent implantation and, of Treatment Interruption versus Continuation 1 year after stenting)-Interruption; DAPT, Dual Antiplatelet Therapy; DES-LATE, Optimal Duration of Clopidogrel Therapy With DES to Reduce Late Coronary Arterial Thrombotic Event; EXCELLENT, Efficacy of Xience/Promus Versus Cypher to Reduce Late Loss After Stenting; ISAR-SAFE, Six versus Twelve Months of Clopidogrel Therapy After Drug-Eluting Stenting; OPTIMIZE, Optimized Duration of Clopidogrel Therapy Following Treatment With the Zotarolimus-Eluting Stent in Real World Clinical Practice; PRODIGY, Prolonging Dual Antiplatelet Treatment After Grading Stent-Induced Intimal Hyperplasia Study; RESET, REal Safety and Efficacy of 3-month dual antiplatelet Therapy following Endeavor zotarolimus-eluting stent implantation; SECURITY, Second Generation Drug-Eluting Stent Implantation Followed by Six- Versus Twelve-Month Dual Antiplatelet Therapy

**Web table 5. Random-effects model sensitivity analysis**

| Outcome                                   | Short-term vs 12-month DAPT |                      |                      |                  |         | Extended vs 12-month DAPT |                      |                      |                  |         |
|-------------------------------------------|-----------------------------|----------------------|----------------------|------------------|---------|---------------------------|----------------------|----------------------|------------------|---------|
|                                           | N of studies                | N of events/patients | N of events/patients | OR (95% CIs)     | P value | N of studies              | N of events/patients | N of events/patients | OR (95% CIs)     | P value |
| <b>Cardiovascular mortality</b>           | 6                           | 68/5977              | 72/6013              | 0.95 (0.68-1.33) | 0.76    | 2                         | 78/7551              | 71/7455              | 1.11 (0.73-1.69) | 0.61    |
| <b>Myocardial infarction</b>              | 7                           | 132/7975             | 120/8020             | 1.11 (0.86-1.43) | 0.41    | 3                         | 127/8196             | 234/8096             | 0.59 (0.40-0.85) | 0.005   |
| <b>Definite/probable stent thrombosis</b> | 7                           | 42/7975              | 32/8020              | 1.23 (0.76-1.97) | 0.40    | 3                         | 26/8196              | 79/8096              | 0.35 (0.20-0.62) | <0.001  |
| <b>Definite stent thrombosis</b>          | 2                           | 9/2981               | 9/2994               | 1.00 (0.39-2.59) | 1.00    | 3                         | 22/8196              | 72/8096              | 0.34 (0.17-0.69) | 0.003   |
| <b>Late stent thrombosis</b>              | 5                           | 20/5051              | 16/5089              | 1.26 (0.39-4.03) | 0.70    | -                         | -                    | -                    | -                | -       |
| <b>Very late stent thrombosis</b>         | -                           | -                    | -                    | -                | -       | 3                         | 26/8196              | 79/8096              | 0.35 (0.20-0.62) | <0.001  |
| <b>Major bleeding</b>                     | 7                           | 28/7975              | 49/8020              | 0.60 (0.37-0.95) | 0.03    | 3                         | 160/8196             | 98/8096              | 1.60 (1.21-2.13) | 0.001   |
| <b>All-cause mortality</b>                | 7                           | 114/7975             | 125/8020             | 0.92 (0.71-1.19) | 0.51    | 3                         | 151/8196             | 115/8096             | 1.30 (1.02-1.66) | 0.03    |

DAPT, dual antiplatelet therapy; OR, odds ratio; CI, confidence interval.

**Web table 6. Subgroup analyses**

| Variable                                  | Subgroup  | Short-term vs 12 months of DAPT |                         |       | Extended vs 12 months of DAPT |                         |       |
|-------------------------------------------|-----------|---------------------------------|-------------------------|-------|-------------------------------|-------------------------|-------|
|                                           |           | Events/Patients                 | Odds Ratio<br>(95% CIs) | P int | Events/Patients               | Odds Ratio<br>(95% CIs) | P int |
| <b>Cardiovascular mortality</b>           |           |                                 |                         |       |                               |                         |       |
| Age                                       | ≥65* y.o. | 8/1404 vs 9/1438                | 0.92 (0.35-2.39)        | 0.99  | 28/2531 vs 19/2514            | 1.47 (0.82-2.64)        | 0.22  |
|                                           | ≤65* y.o. | 55/3647 vs 60/3651              | 0.92 (0.63-1.33)        |       | 50/5020 vs 52/4941            | 0.95 (0.64-1.40)        |       |
| ACS                                       | YES       | 28/2764 vs 31/2766              | 0.90 (0.54-1.52)        | 0.94  | 28/2531 vs 19/2514            | 1.47 (0.82-2.64)        | 0.22  |
|                                           | NO        | 35/2287 vs 38/2323              | 0.93 (0.58-1.47)        |       | 50/5020 vs 52/4941            | 0.95 (0.64-1.40)        |       |
| New P2Y12 inhibitors                      | YES       | 6/682 vs 6/717                  | 1.05 (0.34-3.28)        | 0.84  | 50/5020 vs 52/4941            | 0.95 (0.64-1.40)        | 0.22  |
|                                           | NO        | 55/3310 vs 59/3314              | 0.93 (0.64-1.35)        |       | 28/2531 vs 19/2514            | 1.47 (0.82-2.64)        |       |
| <b>Myocardial infarction</b>              |           |                                 |                         |       |                               |                         |       |
| Age                                       | ≥65* y.o. | 62/3663 vs 63/3711              | 1.00 (0.70-1.43)        | 0.47  | 28/3176 vs 36/3155            | 0.77 (0.47-1.27)        | 0.10  |
|                                           | ≤65* y.o. | 64/3386 vs 53/3385              | 1.21 (0.84-1.75)        |       | 99/5020 vs 198/4941           | 0.48 (0.38-0.62)        |       |
| ACS                                       | YES       | 43/2764 vs 41/2766              | 1.05 (0.68-1.62)        | 0.81  | 19/2531 vs 27/2514            | 0.70 (0.39-1.26)        | 0.73  |
|                                           | NO        | 83/4285 vs 75/4330              | 1.13 (0.82-1.54)        |       | 108/5665 vs 207/5582          | 0.60 (0.31-1.15)        |       |
| New P2Y12 inhibitors                      | YES       | 21/682 vs 19/717                | 1.17 (0.62-2.19)        | 0.89  | 108/5665 vs 207/5582          | 0.60 (0.31-1.15)        | 0.73  |
|                                           | NO        | 103/5308 vs 93/5321             | 1.11 (0.84-1.48)        |       | 19/2531 vs 27/2514            | 0.70 (0.39-1.26)        |       |
| <b>Definite/probable stent thrombosis</b> |           |                                 |                         |       |                               |                         |       |
| Age                                       | ≥65* y.o. | 18/3663 vs 16/3711              | 1.14 (0.58-2.24)        | 0.77  | 7/3176 vs 14/3155             | 0.51 (0.21-1.24)        | 0.22  |
|                                           | ≤65* y.o. | 21/3386 vs 16/3385              | 1.31 (0.68-2.52)        |       | 19/5020 vs 65/4941            | 0.29 (0.17-0.48)        |       |
| ACS                                       | YES       | 18/2764 vs 13/2766              | 1.39 (0.68-2.85)        | 0.65  | 7/2531 vs 11/2514             | 0.63 (0.24-1.63)        | 0.14  |
|                                           | NO        | 21/4285 vs 19/4330              | 1.12 (0.60-2.08)        |       | 19/5665 vs 68/5582            | 0.28 (0.17-0.46)        |       |
| New P2Y12 inhibitors                      | YES       | 3/682 vs 3/717                  | 1.05 (0.21-5.23)        | 0.80  | 19/5665 vs 68/5582            | 0.28 (0.17-0.46)        | 0.14  |
|                                           | NO        | 34/5308 vs 26/5321              | 1.31 (0.79-2.19)        |       | 7/2531 vs 11/2514             | 0.63 (0.24-1.63)        |       |
| <b>Major bleeding</b>                     |           |                                 |                         |       |                               |                         |       |
| Age                                       | ≥65* y.o. | 14/3663 vs 22/3711              | 0.65 (0.33-1.27)        | 0.82  | 41/3176 vs 25/3155            | 1.64 (0.99-2.70)        | 0.97  |
|                                           | ≤65* y.o. | 14/3386 vs 24/3385              | 0.58 (0.30-1.13)        |       | 119/5020 vs 73/4941           | 1.62 (1.21-2.17)        |       |
| ACS                                       | YES       | 9/2764 vs 19/2766               | 0.47 (0.21-1.05)        | 0.42  | 34/2531 vs 24/2514            | 1.41 (0.84-2.39)        | 0.55  |
|                                           | NO        | 19/4285 vs 27/4330              | 0.71 (0.40-1.28)        |       | 126/5665 vs 74/5582           | 1.69 (1.27-2.26)        |       |
| New P2Y12 inhibitors                      | YES       | 5/682 vs 8/717                  | 0.65 (0.21-2.01)        | 1.00  | 126/5665 vs 74/5582           | 1.69 (1.27-2.26)        | 0.55  |
|                                           | NO        | 21/5308 vs 32/5321              | 0.66 (0.38-1.14)        |       | 34/2531 vs 24/2514            | 1.41 (0.84-2.39)        |       |

\*62.5 y.o. for comparison of extended vs 12 month DAPT; DAPT, dual antiplatelet therapy; ACS, acute coronary syndrome; DES, drug eluting stent.

**Web table 7. Harbord's regression test**

| Event                              | Comparison                       | 2-tailed p-value |
|------------------------------------|----------------------------------|------------------|
| Cardiovascular mortality           | Short-term DAPT vs 12 month DAPT | 0.75             |
|                                    | Extended DAPT vs 12 month DAPT   | NA               |
| Myocardial infarction              | Short-term DAPT vs 12 month DAPT | 0.97             |
|                                    | Extended DAPT vs 12 month DAPT   | 0.35             |
| Definite/Probable Stent Thrombosis | Short-term DAPT vs 12 month DAPT | 0.25             |
|                                    | Extended DAPT vs 12 month DAPT   | 0.98             |
| Major bleeding                     | Short-term DAPT vs 12 month DAPT | 0.11             |
|                                    | Extended DAPT vs 12 month DAPT   | 0.49             |
| All-cause mortality                | Short-term DAPT vs 12 month DAPT | 0.12             |
|                                    | Extended DAPT vs 12 month DAPT   | 0.44             |
| Repeat revascularization           | Short-term DAPT vs 12 month DAPT | 0.49             |
|                                    | Extended DAPT vs 12 month DAPT   | NA               |

NA =not available
